# Supplementary material for: Role of the carboxy groups of triterpenoids in their inhibition of the nucleation of amyloid β42 required for forming toxic oligomers
Source: Royal Society of Chemistry journal article supplement (doi:10.1039/c8cc03230k), 2018-01-01
Supplement: c8cc03230k1.pdf [file c8cc03230k1.pdf]

## Electronic Supplementary Information (ESI)

### Role of the carboxy groups of triterpenoids in their inhibition of the nucleation of amyloid $\beta$ 42 required for forming toxic oligomers

Kazuma Murakami,<sup>a</sup> Takuya Yoshioka,<sup>a</sup> Shiori Horii,<sup>a</sup> Mizuho Hanaki,<sup>a</sup> Satohiro Midorikawa,<sup>b</sup> Shinji Taniwaki,<sup>b</sup> Hiroki Gunji,<sup>b</sup> Ken-ichi Akagi,<sup>c</sup> Taiji Kawase,<sup>d</sup> Kenji Hirose<sup>d</sup> and Kazuhiro Irie<sup>\*a</sup>

<sup>a</sup>Division of Food Science and Biotechnology, Graduate School of Agriculture, Kyoto University, Kyoto 606-8502, Japan

<sup>b</sup>Alps-Pharmaceutical Industry Co., Ltd., Gifu 509-4241, Japan

<sup>c</sup>National Institute of Biomedical Innovation, Health and Nutrition, Osaka 567-0085, Japan

<sup>d</sup>Nihon Waters, K. K., Tokyo 140-0001, Japan

\*Corresponding author

Kazuhiro Irie, Ph.D., Tel: +81-75-753-6281. Fax: +81-75-753-6284.

E-mail: irie@kais.kyoto-u.ac.jp.

#### [Contents]

Supplementary discussion

Experimental procedures

Supplementary references

Fig. S1-S3

## Supplementary discussion

Regarding the atomic resolution based on the NMR results (Fig. 2a,b), the C-27 ferulate moiety of **1** was deduced to interact with these  $\beta$ -sheet region including benzene rings (Gln15-Ala21) of A $\beta$ 42 due to its inherent hydrophobicity and planarity derived from  $\alpha,\beta$ -unsaturated carbonyl groups *via*  $\pi$ - $\pi$  stacking, similarly to the case of curcumin.<sup>1</sup> Instead, the basic amino acid residues (Arg5 or Lys16) could also be assumed to contribute to the formation of salt bridge with C-28 carboxy group of **1**.

Given IM-MS data of A $\beta$ 42 using **1**~**3** (Fig. 2c-h), The remarkable perturbation of chemical shifts in the neighboring residues to Lys16, but not Lys28, observed in SOFAST-HMQC studies (Fig. 2a,b), suggest a coordinated structural changes of intermolecular  $\beta$ -sheet regions, induced from the salt bridge formation with Lys28 residue. Alternatively, adduct formation is more likely to occur at Lys16 than that at Lys28. Our group have reported that the toxic oligomers could originate from toxic conformer possessing the turn structure at positions 22 and 23,<sup>2</sup> which might be one of the targets by **1**.

## Experimental procedures

### 1. Thioflavin-T (Th-T) fluorescence assay

The aggregative ability of each amyloid  $\beta$ 42 (A $\beta$ 42) was evaluated by the thioflavin-T (Th-T; Sigma-Aldrich, St. Louis, MO, USA) fluorescence assay developed by Naiki and Gejyo.<sup>3</sup> The basic procedure has been described elsewhere<sup>4</sup>, with the exception of the description of continuous-type measurement. For example, 435  $\mu$ L of phosphate buffered saline (PBS: 50 mM sodium phosphate and 100 mM NaCl, pH 7.4) was aliquoted into a 1.5 mL tube, followed by the addition of 10  $\mu$ L of 1 mM Th-T solution in distilled water and 5  $\mu$ L of each test sample [**1**: uncarinic acid C,<sup>5</sup> **2**: C-27 methyl alcohol of **1**,<sup>5</sup> **3**: C-28 methyl alcohol of **1**,<sup>5</sup> **4**: asiatic acid (Tokyo Kasei, Tokyo, Japan), **5**:  $\alpha$ -amyrin (Extrasynthese, Lyon, France), **6**: rhein (Tokyo Kasei), and **7**: chrysophanic acid (Tokyo Kasei)] (2 mM), dissolved with ethanol (**1**–**5**) or DMSO (**6**, **7**). Then, the 50  $\mu$ L solution of A $\beta$ 42 (100  $\mu$ M in 0.1% NH<sub>4</sub>OH), synthesized as reported previously,<sup>4</sup> was added to the tube, so that the

final concentration was 10  $\mu$ M of A $\beta$ 42, 20  $\mu$ M of each sample, and 20  $\mu$ M of Th-T. After pre-incubation on ice for 15 min, the solution was aliquoted into a 96-well black plate (Thermo Scientific, Rockford, IL, USA) before sequentially measuring the fluorescence at 430 nm excitation and 485 nm emission (100  $\mu$ L/well) at 23 °C with agitation at 10-min intervals using a microplate reader (Fluoroskan Ascent; Thermo Scientific). Th-T relative fluorescence was expressed after subtraction of vehicle control without A $\beta$ 42.

For treatment with 1,1,1,3,3,3-hexafluoro-2-propanol (HFIP), A $\beta$ 42 was first dissolved in HFIP at 1 mg/mL before incubating at room temperature for 30 min. The resultant solution was sonicated for 5 min, and then dispensed in desired volumes. The solution was left at room temperature overnight to volatilize the HFIP. This was followed by centrifugal concentration to obtain HFIP-treated A $\beta$ 42 (HFIP-A $\beta$ 42), which was monomeric and its purity was >98% (Fig. S1a). The nucleation time (*ca.* 2 h) of non-treated A $\beta$ 42 was earlier than that (*ca.* 4 h) of HFIP-A $\beta$ 42 (Fig. S1b), and these results are generally in agreement with our previous study.<sup>6</sup>

## 2. Circular dichroism (CD) spectrometry

CD spectra were measured using a 0.1 mm quartz cell as described elsewhere.<sup>4</sup> HFIP-A $\beta$ 42 solution in 0.1% NH<sub>4</sub>OH at 250  $\mu$ M and **1** solution in ethanol at 5 mM were diluted with PBS to a final concentration of 25 and 50  $\mu$ M, respectively, and were then incubated without or with **1** in PBS at 37 °C. After several intervals, an aliquot (200  $\mu$ L) was loaded into the quartz cell, and the CD spectrum was recorded at 190–250 nm. The spectra of A $\beta$ 42 are shown after subtraction of the spectrum of the vehicle alone, and those in the presence of **1** are shown after subtraction of the spectrum for **1** alone.

## 3. MTT assay

SH-SY5Y cells (ATCC, Manassas, VA, USA), maintained in a mixed medium containing equal amounts of Eagle's minimal essential medium (EMEM; Wako) and Ham's F12 medium (Wako) containing 10% fetal bovine serum, were used as one of the

typical neuronal cell models to estimate the neurotoxicity of A $\beta$ 42 with slight modifications to the described method.<sup>7</sup> In brief, HFIP-A $\beta$ 42 and **1** were dissolved in 0.1% NH<sub>4</sub>OH or in ethanol to make a 12 $\times$  stock before being diluted with culture medium to the desired final concentration (1% ethanol). After pre-incubating 120  $\mu$ L of A $\beta$ 42 with **1** for 30 min at room temperature, the culture medium used on near-confluent cells ( $1 \times 10^4$  cells/well) for overnight adaptation was exchanged with the pre-incubated solution (120  $\mu$ L). After incubation for 24 h at 37 °C, 15  $\mu$ L/well of Dye solution in CellTiter 96 Non-Radioactive Cell Proliferation Assay kit (Promega, Madison, WI, USA) was added to the cells, followed by incubation for 4 h at 37 °C. The solubilization/stop solution (100  $\mu$ L/well) was subsequently added to the cells. The cell lysate was subsequently incubated overnight in the dark at room temperature before performing measurements at 570 nm with a microplate reader (Multiskan FC; Thermo Scientific). The absorbance obtained by adding the vehicle (0.1% NH<sub>4</sub>OH + 1% ethanol) was taken as 100%.

#### **4. <sup>1</sup>H-<sup>15</sup>N SOFAST-HMQC NMR measurement**

<sup>1</sup>H-<sup>15</sup>N SOFAST-HMQC measurement was carried out mainly according to our previous report.<sup>6</sup> Uniformly <sup>15</sup>N-labeled A $\beta$ 42 (67.7  $\mu$ g; rPeptide, Bogart, GA, USA) treated with HFIP was dissolved at 250  $\mu$ M in 60  $\mu$ L of 10 mM NaOH, containing 10 mM EDTA. **1** was dissolved in ethanol at 1 mM, and 30  $\mu$ L of the solution was diluted with 504  $\mu$ L of 5 mM phosphate buffer (PB: 5 mM sodium phosphate, pH 6.98) containing 1% D<sub>2</sub>O (6  $\mu$ L). Then, 250  $\mu$ M of the A $\beta$ 42 solution (60  $\mu$ L) was added, so that the final concentrations of A $\beta$ 42 and **1** were 25  $\mu$ M and 50  $\mu$ M, respectively. Peaks were assigned by referring to previous findings.<sup>6,8-10</sup> Each distance in the <sup>1</sup>H-<sup>15</sup>N chemical shifts between the cross peaks of A $\beta$ 42 alone and A $\beta$ 42 in the presence of **1** was calculated by the Pythagorean theorem. <sup>15</sup>N chemical shifts were scaled one-tenth relative to <sup>1</sup>H chemical shifts because the measurement range (6.5–8.6 ppm) of observations of <sup>1</sup>H was approximately one-tenth of that (107–128 ppm) of <sup>15</sup>N.

## 5. Ion mobility–mass spectrometry (IM-MS).

A $\beta$ 42 or Lys16Nle,Lys28Nle-A $\beta$ 42<sup>4</sup> was dissolved in 0.1% NH<sub>4</sub>OH at 400  $\mu$ M and each test sample was solubilized in ethanol at 8 mM, followed by a 10-fold and 100-fold dilution with 25 mM ammonium acetate (pH 7.4), respectively. The resultant solution (A $\beta$ 42: 40  $\mu$ M, test sample: 80  $\mu$ M) was centrifuged for 4 min at 2,000 g (4 °C) before infusion into the MS apparatus using a glass capillary (Nanoflow Probe Tip, Waters). Mass spectra and ion mobility experiments were accomplished on SYNAPT G2-Si HDMS (Waters) using a nanoelectrospray as an ionization source. The instrument was operated in negative ion mode with a capillary voltage of 1.0 kV, a sample cone voltage of 10 V, a source temperature of 50 °C, and a desolvation temperature of 50 °C. For the ion mobility measurement, nitrogen gas was used in the ion mobility cell, and the cell pressure was maintained at approximately 2.95 mbar with a wave velocity of 300–1,000 m/s and a wave height of 10–40 V. Data acquisition and processing were performed with the MassLynx (V4.1) and DriftScope (V2.8) software supplied with the instrument. The CsI cluster ions were used for m/z scale as a calibrator.

### Supplementary references

- 1 Y. Masuda, M. Fukuchi, T. Yatawaga, M. Tada, K. Takeda, K. Irie, K. Akagi, Y. Monobe, T. Imazawa and K. Takegoshi, *Bioorg. Med. Chem.*, 2011, **19**, 5967-5974.
- 2 Y. Masuda, S. Uemura, R. Ohashi, A. Nakanishi, K. Takegoshi, T. Shimizu, T. Shirasawa and K. Irie, *ChemBioChem*, 2009, **10**, 287-295.
- 3 H. Naiki and F. Gejyo, *Methods Enzymol.*, 1999, **309**, 305-318.
- 4 M. Sato, K. Murakami, M. Uno, Y. Nakagawa, S. Katayama, K. Akagi, Y. Masuda, K. Takegoshi and K. Irie, *J. Biol. Chem.*, 2013, **288**, 23212-23224.
- 5 T. Yoshioka, K. Murakami, K. Ido, M. Hanaki, K. Yamaguchi, S. Midorikawa, S. Taniwaki, H. Gunji and K. Irie, *J. Nat. Prod.*, 2016, **79**, 2521-2529.
- 6 M. Hanaki, K. Murakami, K. Akagi and K. Irie, *Bioorg. Med. Chem.*, 2016, **24**, 304-313.
- 7 K. Murakami, M. Tokuda, T. Suzuki, Y. Irie, M. Hanaki, N. Izuo, Y. Monobe, K. Akagi, R. Ishii, H. Tatebe, T. Tokuda, M. Maeda, T. Kume, T. Shimizu and K. Irie, *Sci. Rep.*, 2016, **6**, 29038.

- 8 L. Hou, H. Shao, Y. Zhang, H. Li, N. K. Menon, E. B. Neuhaus, J. M. Brewer, I. J. Byeon, D. G. Ray, M. P. Vitek, T. Iwashita, R. A. Makula, A. B. Przybyla and M. G. Zagorski, *J. Am. Chem. Soc.*, 2004, **126**, 1992-2005.
- 9 R. P. Friedland, J. M. Tedesco, A. C. Wilson, C. S. Atwood, M. A. Smith, G. Perry and M. G. Zagorski, *J. Biol. Chem.*, 2008, **283**, 22550-22556.
- 10 D. K. Weber, M. A. Sani and J. D. Gehman, *Amino Acids*, 2014, **46**, 2415-2426.

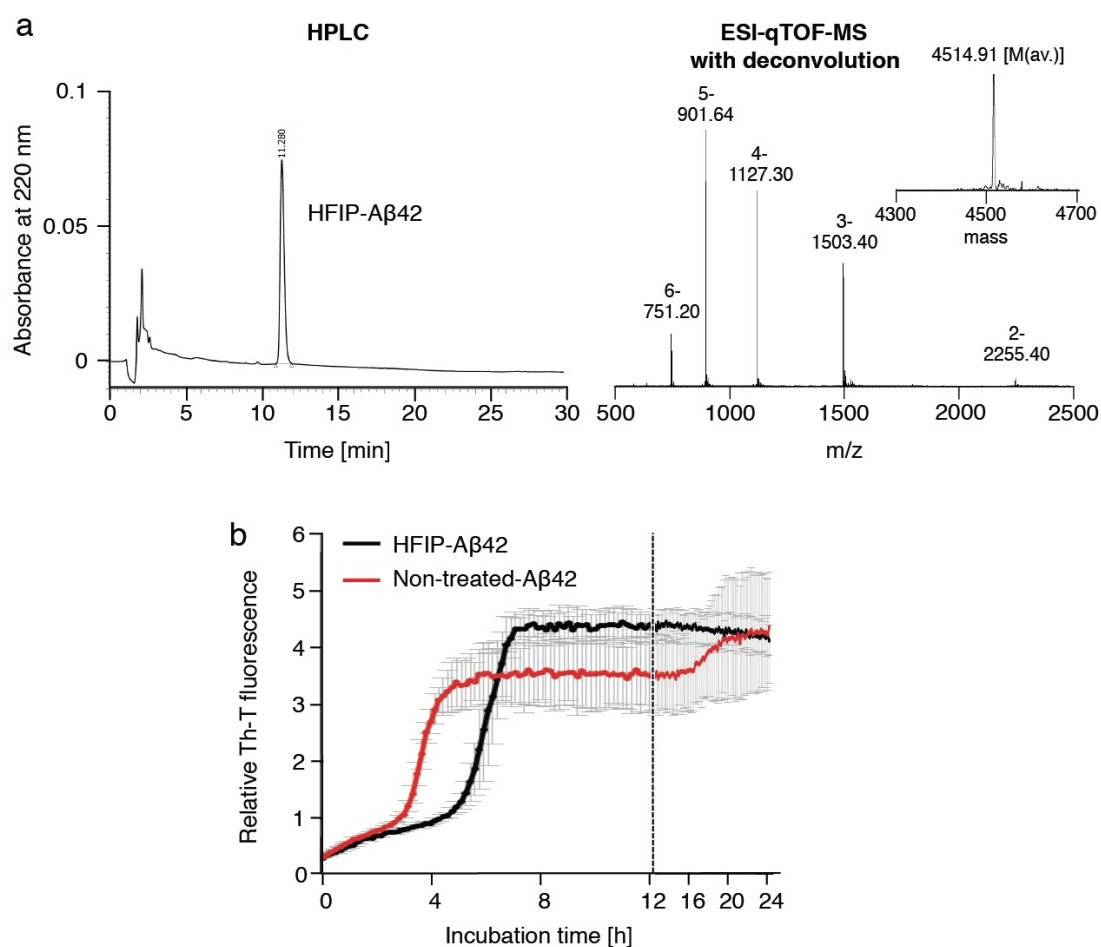

**Fig. S1** (a) HPLC profile and ESI-qTOF-MS data with deconvolution of HFIP-treated A $\beta$ 42, synthesized in our group.<sup>4</sup> HPLC condition: Develosil ODS-UG-5 (100 x 6 mm I.D.), 1 mL/min, UV 220 nm, 10-50% acetonitrile containing 0.1% NH<sub>4</sub>OH (30 min linear gradient), 625 pmole/25  $\mu$ L (0.1% NH<sub>4</sub>OH) injection. HFIP-treated A $\beta$ 42, m/z (calcd for av. mass, 4514.08). (b) Sequential Th-T aggregation test with a 10-min interval. HFIP-treated A $\beta$ 42 or non-treated A $\beta$ 42 (10  $\mu$ M) was incubated in the presence of Th-T (20  $\mu$ M) at room temperature (23  $^{\circ}$ C). Data are presented as the mean  $\pm$  SD (n = 4).

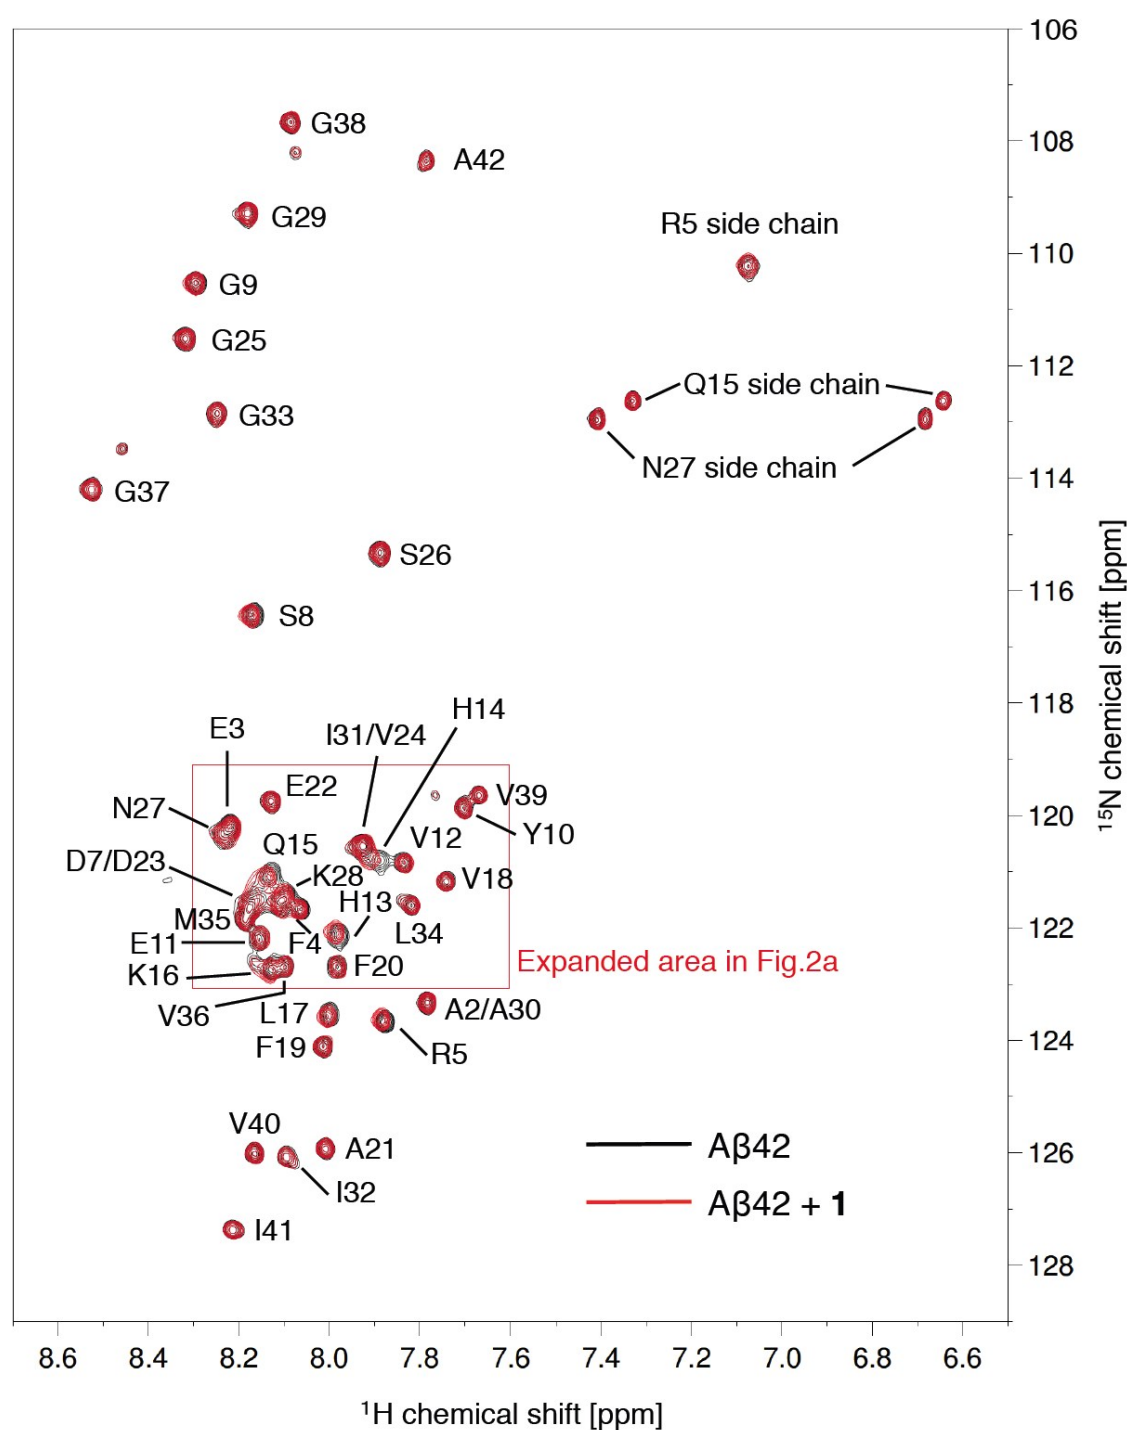

**Fig. S2** Full spectra of  $^1\text{H}$ - $^{15}\text{N}$  SOFAST-HMQC NMR of A $\beta$ 42 in the absence or presence of **1**, the expanded version of which is shown in Fig. 2a in the main text. Black cross peaks, A $\beta$ 42 alone; red cross peaks, A $\beta$ 42 treated with **1**.



Lys16Nle,Lys28Nle-A $\beta$ 42 + **1**

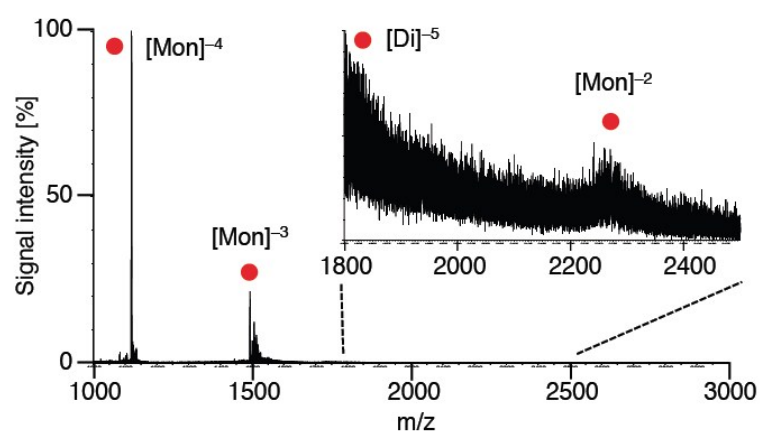

**Fig. S3** NanoESI-TOF-MS of Lys16Nle,Lys28Nle-A $\beta$ 42 (40  $\mu$ M) with **1** (80  $\mu$ M). Peaks for A $\beta$ 42 are noted with red circles. Nle = norleucine
